# Supplementary material for: Nuclear import of dimerized ribosomal protein Rps3 in complex with its chaperone Yar1
Source: PubMed Central journal article supplement (PMC5098186; doi:10.1038/srep36714), 2016-11-07
Supplement: srep36714-s1.pdf [file srep36714-s1.pdf]

## Supplementary Information

### Nuclear import of dimerized ribosomal protein Rps3 in complex with its chaperone

#### Yar1

Valentin Mitterer<sup>1</sup>, Nadine Gantenbein<sup>1</sup>, Ruth Birner-Gruenberger<sup>2,3</sup>, Guillaume Murat<sup>4</sup>,  
Helmut Bergler<sup>1</sup>, Dieter Kressler<sup>4</sup>, Brigitte Pertschy<sup>1,\*</sup>

<sup>1</sup> Institut für Molekulare Biowissenschaften, Universität Graz, Humboldtstrasse 50, 8010  
Graz, Austria

<sup>2</sup> Institute of Pathology, Research Unit Functional Proteomics and Metabolic Pathways,  
Medical University of Graz, Stiftingtalstrasse 24, 8010 Graz

<sup>3</sup> Omics Center Graz, BioTechMed-Graz, Stiftingtalstrasse 24, 8010 Graz

<sup>4</sup> Unit of Biochemistry, Department of Biology, University of Fribourg, Chemin du Musée 10,  
CH-1700 Fribourg, Switzerland

\* Correspondence: [brigitte.pertschy@uni-graz.at](mailto:brigitte.pertschy@uni-graz.at) (B.P.)

# Supplementary Figure 1

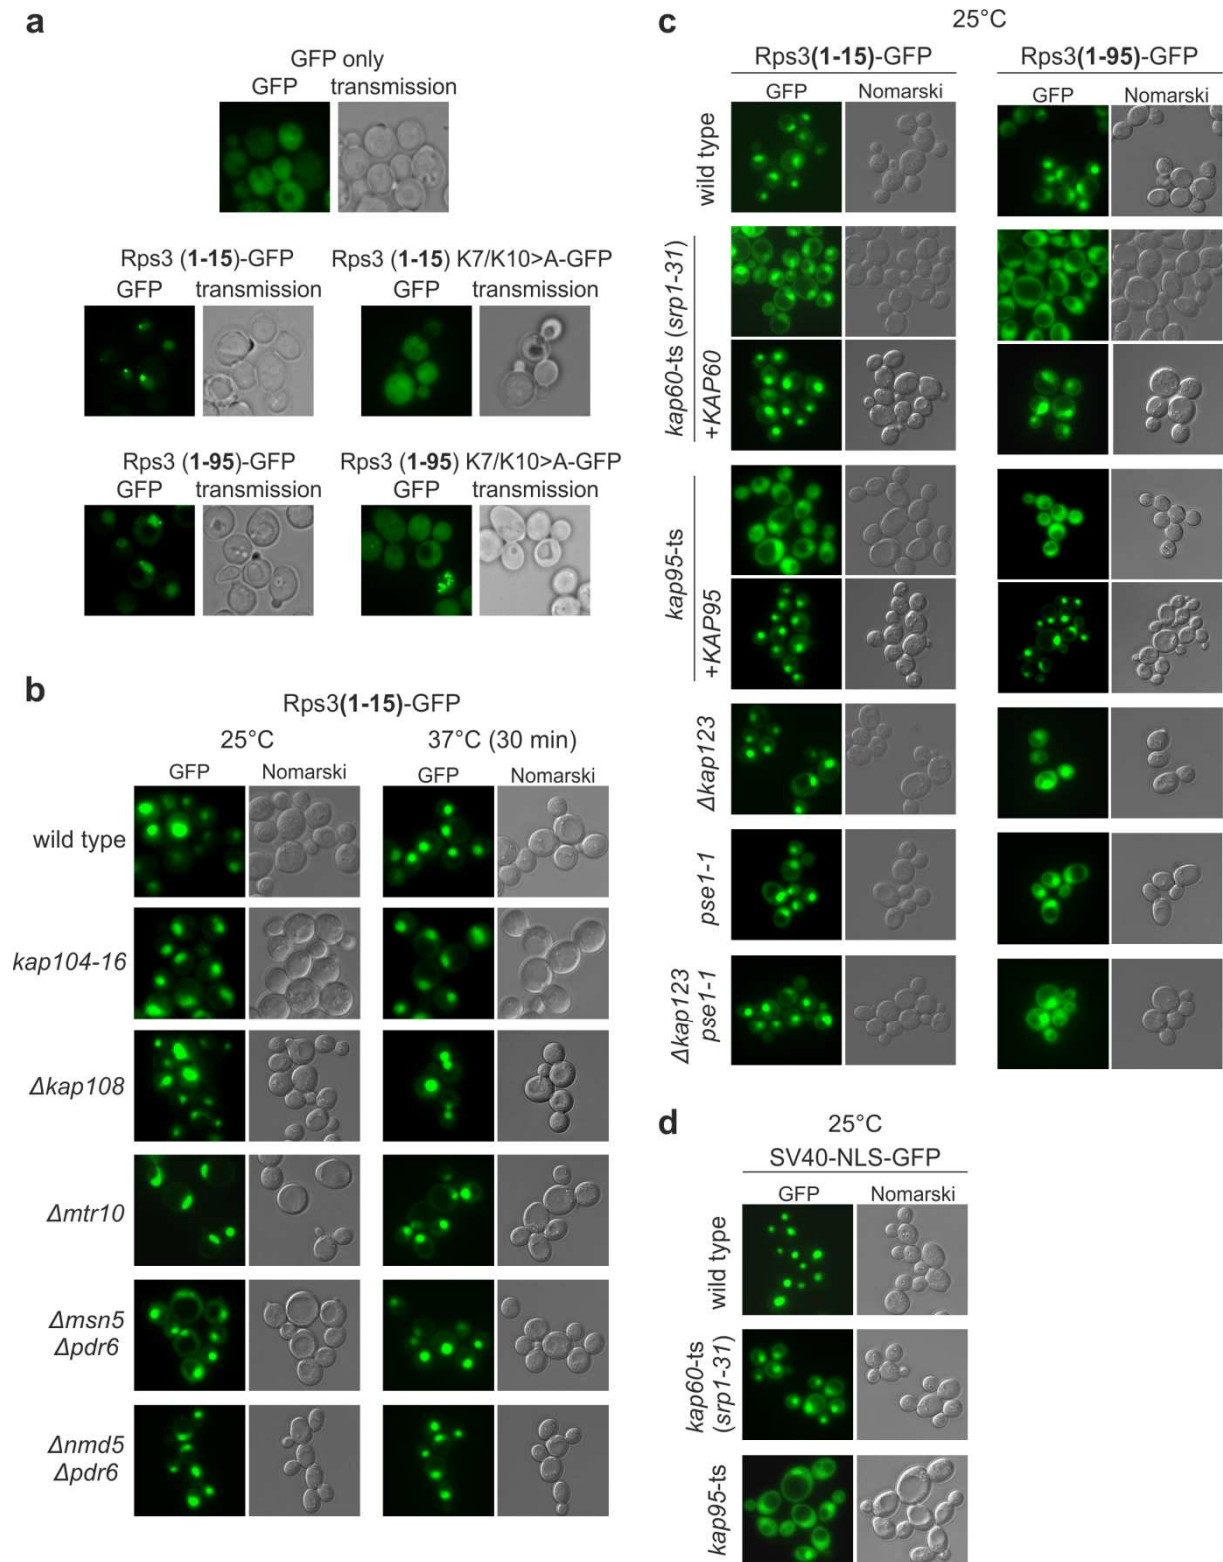

**Supplementary Figure S1. Kap60/Kap95, Kap123 and Pse1 are required for efficient nuclear import of Rps3.** The localization of the indicated N-terminal Rps3 reporter constructs (a), (b) and (c) or SV-40NLS (d) fused to 3xyEGFP was assessed by

fluorescence microscopy in W303 wild-type or the indicated karyopherin mutant strains after incubation at the indicated temperatures. (a) 3xyEGFP alone was used as control and displayed predominantly cytoplasmic localization.

## Supplementary Figure 2

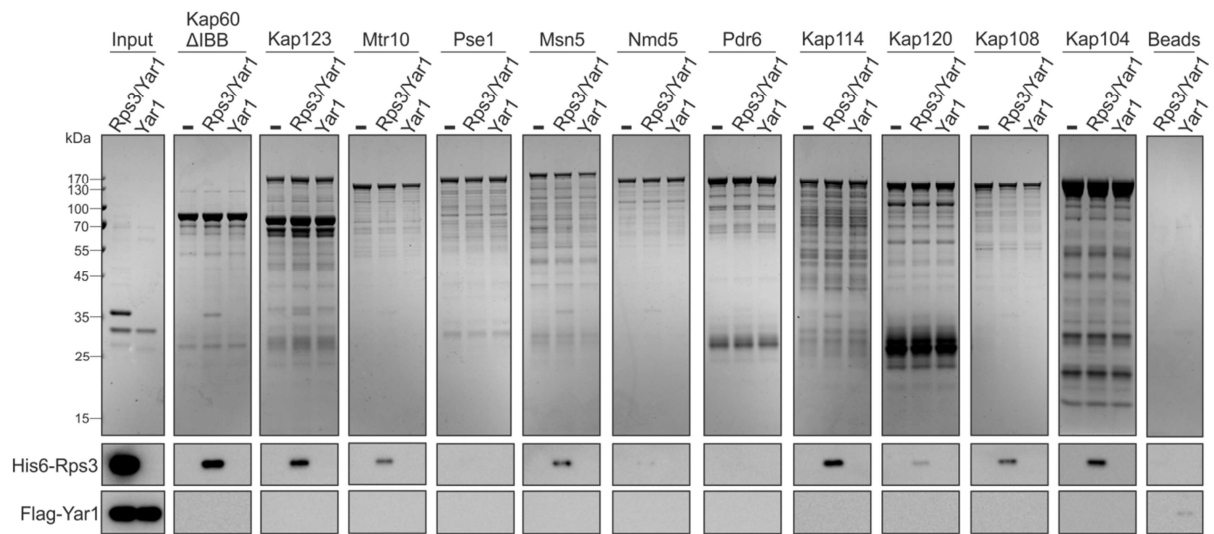

**Supplementary Figure S2. Rps3 is transferred from the Rps3/Yar1 complex onto importins.** The indicated GST-tagged importins were expressed in *E. coli*, immobilized on glutathione-agarose beads and subsequently incubated with purified His6-Rps3/Flag-Yar1 complex, purified Flag-Yar1 or buffer (-). As negative control, empty glutathione-agarose beads were incubated with the His6-Rps3/Flag-Yar1 complex or Flag-Yar1 (beads). After subsequent washing steps, bound material was eluted and analyzed by SDS-PAGE and Coomassie staining or Western blotting with the indicated antibodies. Notably, Yar1 was not detected bound to any of the tested importins, also not in the samples where Rps3-binding was observed.

### Supplementary Figure 3

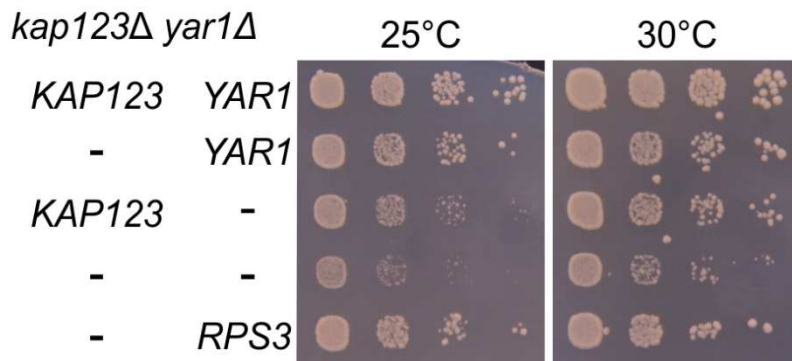

**Supplementary Figure S3. Deletion of *KAP123* slightly enhances the growth defect of a *yar1* deletion strain.** A *kap123Δ yar1Δ* strain was transformed with plasmids harboring the indicated wild-type alleles or empty plasmids (-). Cells were spotted in 10-fold serial dilutions on SD-Ura-Leu plates and incubated at the indicated temperatures for 3 days.

# Supplementary Figure 4

**a**

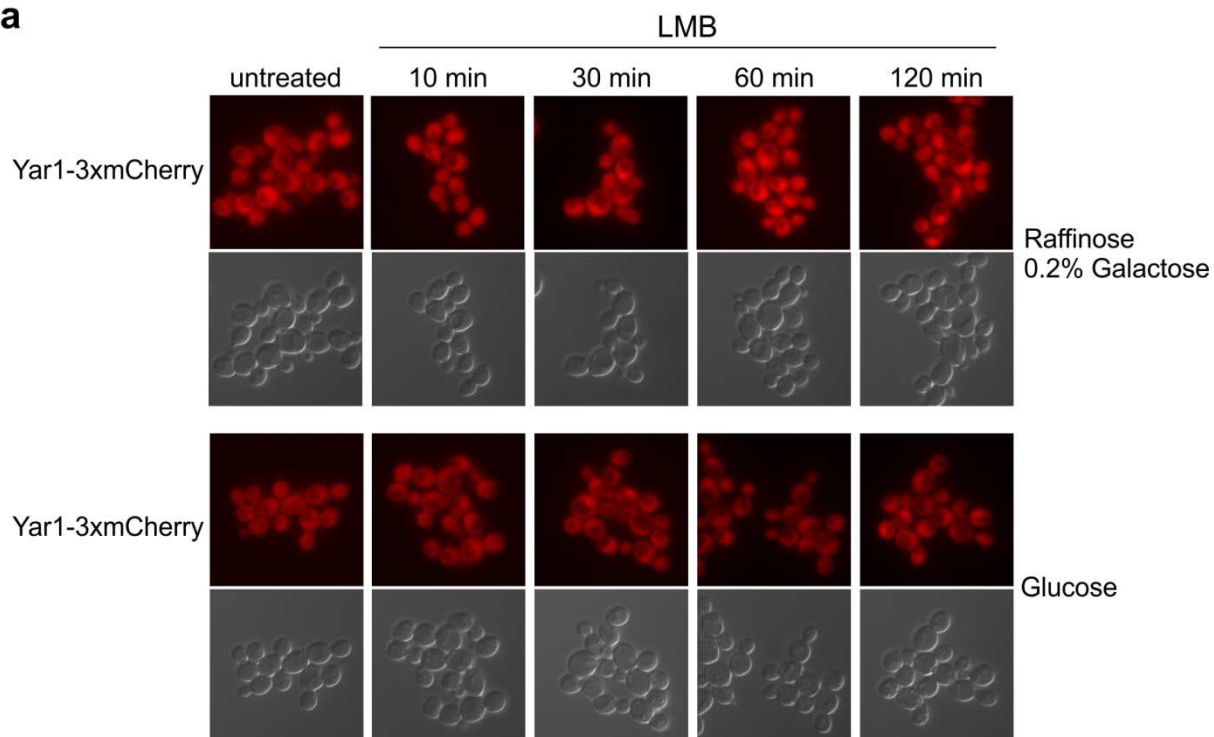

**b**

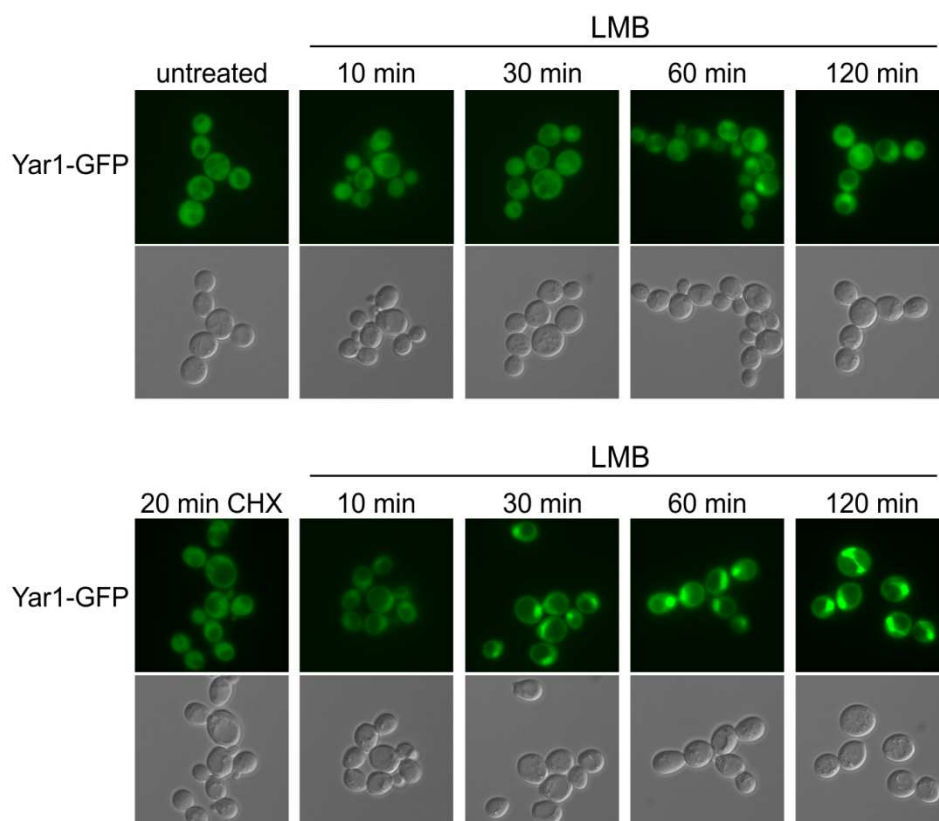

**Supplementary Figure S4. Yar1 enters the nucleus after Rps3 depletion or inhibition of protein synthesis. (a)** A 3xmCherry tag was C-terminally fused to the *YAR1* gene locus in a leptomycin B (LMB)-sensitive *crm1T539C rps3Δ* mutant strain in which plasmid-encoded *RPS3* was expressed under the control of a *GAL1* promoter. The localization of the Yar1-3xmCherry fusion protein was assessed under conditions allowing Rps3 expression (medium containing 2% raffinose and 0.2% galactose as carbon source) (upper panel) or after depletion of Rps3 for 2h in medium containing glucose as carbon source (lower panel). The Yar1-3xmCherry localization was examined in untreated cells or after addition of LMB for the indicated time. **(b)** A LMB-sensitive *crm1T539C yar1Δ* strain was transformed with a plasmid encoding a Yar1-eGFP fusion protein. The localization of Yar1-eGFP was assessed in untreated cells or in cells treated with LMB for the indicated time (upper panel). The localization of Yar1-eGFP was assessed after incubation for 20 min with cycloheximide (CHX) prior to LMB addition (lower panel).

## Supplementary Figure 5

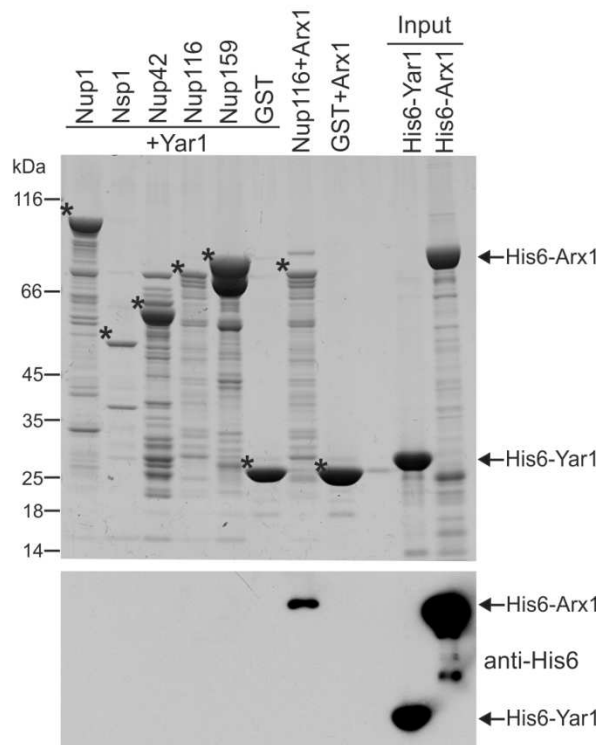

**Supplementary Figure S5. Yar1 does not interact with nucleoporins.** The indicated GST-tagged nucleoporins (or truncations thereof; see Table S3) were immobilized on glutathione-agarose beads and incubated with purified His6-Yar1. As positive control the Nup116 FG-repeat fragment was incubated with purified His6-Arx1 (pre-60S export factor). Bound material was eluted in buffer containing 20 mM reduced glutathione and samples were subsequently analyzed by SDS-PAGE and Coomassie staining or Western blotting. Asterisks indicate the respective bait proteins.



**Table S1. *S. cerevisiae* strains**

| <b>Name</b>                                              | <b>Genotype</b>                                                                            | <b>Source</b>                                                            |
|----------------------------------------------------------|--------------------------------------------------------------------------------------------|--------------------------------------------------------------------------|
| W303                                                     | <i>ade2-1, his3-11, 15, leu2-3,112, trp1-1, ura3-1, can1-100</i>                           | <sup>1</sup>                                                             |
| <i>srp1-31/kap60ts</i>                                   | W303 MATa <i>srp1-31</i>                                                                   | <sup>2</sup>                                                             |
| <i>kap95ts</i>                                           | MATa <i>leu2 his3 trp1 ura3 rsl1-4</i>                                                     | Ed Hurt lab, backcross from PSY1103 <sup>3</sup> with W303               |
| $\Delta$ <i>kap123</i> (PSY967)                          | W303 MATa <i>kap123::HIS3</i>                                                              | <sup>4</sup>                                                             |
| <i>pse1-1</i> (PSY1201)                                  | W303 MATa <i>pse1-1</i>                                                                    | <sup>4</sup>                                                             |
| $\Delta$ <i>kap123 pse1-1</i> (PSY1042)                  | W303 MATa <i>pse1-1 kap123::HIS3</i>                                                       | <sup>4</sup>                                                             |
| $\Delta$ <i>sxm1</i> (PSY1200)                           | W303 MATa <i>sxm1::HIS3</i>                                                                | <sup>4</sup>                                                             |
| $\Delta$ <i>mtr10</i>                                    | W303 MATa <i>mtr10::HIS3</i>                                                               | <sup>5</sup>                                                             |
| $\Delta$ <i>msn5 \Delta</i> <i>pdr6</i>                  | W303 MATa <i>pdr6::HIS3 msn5::TRP1</i>                                                     | Ed Hurt lab                                                              |
| $\Delta$ <i>nmd5 \Delta</i> <i>pdr6</i>                  | W303 MATa <i>pdr6::HIS3 nmd5::HIS3</i>                                                     | Ed Hurt lab                                                              |
| RPS3-TAP KAP60-3xHA                                      | W303 MATa RPS3-TAP::natNT2 KAP60-3xHA:: HIS3MX6                                            | this study                                                               |
| YAR1-TAP KAP60-3xHA                                      | W303 MATa YAR1-TAP::natNT2 KAP60-3xHA:: HIS3MX6                                            | this study                                                               |
| KAP60-3xHA                                               | W303 MATa KAP60-3xHA:: HIS3MX6                                                             | this study                                                               |
| YAR1-TAP RPS3-Flag                                       | W303 MATa YAR1-TAP::HIS3MX6 RPS3-Flag::natNT2                                              | this study                                                               |
| <i>srp1-31 \Delta</i> <i>yar1</i>                        | W303 MATa <i>srp1-31 yar1::HIS3MX6</i>                                                     | this study ( <i>YAR1</i> knockout in <i>srp1-31</i> )                    |
| <i>kap95ts \Delta</i> <i>yar1</i>                        | MATa <i>leu2 his3 trp1 ura3 rsl1-4 yar1::HIS3MX6</i>                                       | this study ( <i>YAR1</i> knockout in <i>kap95ts</i> )                    |
| KAP104 shuffle                                           | MATa <i>kap104::natNT2 ade3::kanMX4 [pRS316-KAP104]</i>                                    | <sup>6</sup>                                                             |
| $\Delta$ <i>kap123 \Delta</i> <i>yar1</i>                | W303 MATa <i>ade3::kanMX4 yar1::natNT2 kap123::HIS3MX6</i>                                 | this study                                                               |
| <i>crm1T539C YAR1-3xmCherry pGAL111-RPS3</i>             | W303 MATa <i>ADE2 crm1T539C::kanMX4 YAR1-3xmCherry::hphNT1 rps3::natNT2 [pGAL111-RPS3]</i> | this study                                                               |
| $\Delta$ <i>crm1 \Delta</i> <i>yar1 pRS315-crm1T539C</i> | W303 MATa <i>crm1::kanMX yar1::natNT2 [pRS315-crm1T539C]</i>                               | this study (based on MNY8 strain from Neville and Rosbash <sup>7</sup> ) |

**Table S2. *S. cerevisiae* plasmids**

| <b>Name</b>                                            | <b>Relevant Information</b>                                                           | <b>Source</b>                             |
|--------------------------------------------------------|---------------------------------------------------------------------------------------|-------------------------------------------|
| pADH111-RPS3(1-15)-(GA) <sub>5</sub> -3xyEGFP          | CEN, <i>LEU2</i> , <i>PADH1</i> , <i>TADH1</i> , C-terminal (GA) <sub>5</sub> 3xyEGFP | <sup>8</sup>                              |
| pADH111-RPS3(1-15.KKRK>A)-(GA) <sub>5</sub> -3xyEGFP   | CEN, <i>LEU2</i> , <i>PADH1</i> , <i>TADH1</i> , C-terminal (GA) <sub>5</sub> 3xyEGFP | this study                                |
| pADH111-RPS3(1-15.K7/K10>A)-(GA) <sub>5</sub> -3xyEGFP | CEN, <i>LEU2</i> , <i>PADH1</i> , <i>TADH1</i> , C-terminal (GA) <sub>5</sub> 3xyEGFP | this study                                |
| pADH111-RPS3(1-95)-(GA) <sub>5</sub> -3xyEGFP          | CEN, <i>LEU2</i> , <i>PADH1</i> , <i>TADH1</i> , C-terminal (GA) <sub>5</sub> 3xyEGFP | this study                                |
| pADH111-RPS3(1-95.KKRK>A)-(GA) <sub>5</sub> -3xyEGFP   | CEN, <i>LEU2</i> , <i>PADH1</i> , <i>TADH1</i> , C-terminal (GA) <sub>5</sub> 3xyEGFP | this study                                |
| pADH111-RPS3(1-95.K7/K10>A)-(GA) <sub>5</sub> -3xyEGFP | CEN, <i>LEU2</i> , <i>PADH1</i> , <i>TADH1</i> , C-terminal (GA) <sub>5</sub> 3xyEGFP | this study                                |
| pADH111- (GA) <sub>5</sub> -3xyEGFP                    | CEN, <i>LEU2</i> , <i>PADH1</i> , <i>TADH1</i> , C-terminal (GA) <sub>5</sub> 3xyEGFP | <sup>8</sup>                              |
| pADH111-SV40-NLS-(GA) <sub>5</sub> -3xyEGFP            | CEN, <i>LEU2</i> , <i>PADH1</i> , <i>TADH1</i> , C-terminal (GA) <sub>5</sub> 3xyEGFP | <sup>8</sup>                              |
| pRS314-KAP60                                           | CEN, <i>URA3</i>                                                                      | <sup>9</sup>                              |
| pRS314-KAP95                                           | CEN, <i>URA3</i>                                                                      | Ed Hurt lab, subcloned from <sup>10</sup> |
| pRS315-YAR1                                            | CEN, <i>LEU2</i> , <i>PYAR1</i> , <i>TYAR1</i>                                        | <sup>8</sup>                              |
| pRS315-RPS3                                            | CEN, <i>LEU2</i> , <i>PRPS3</i> , <i>TRPS3</i>                                        | <sup>8</sup>                              |
| pRS314-kap104-16                                       | CEN, <i>TRP1</i> , <i>PKAP104</i> , <i>TKAP104</i>                                    | <sup>11</sup>                             |
| YCplac22-KAP123                                        | CEN, <i>TRP1</i> , <i>PKAP123</i> , <i>TKAP123</i>                                    | this study                                |
| pGAL111-RPS3                                           | CEN, <i>LEU2</i> , <i>PGAL1</i> , <i>TADH1</i>                                        | this study                                |
| pRS316-YAR1-EGFP                                       | CEN, <i>URA3</i> , <i>PYAR1</i> , <i>TADH1</i>                                        | <sup>8</sup>                              |

P and T denote promoter and terminator, respectively.

**Table S3. *E. coli* expression plasmids**

| <b>Name</b>                                         | <b>Relevant Information</b>                          | <b>Source</b> |
|-----------------------------------------------------|------------------------------------------------------|---------------|
| pETDuet-1-His6-Rps3/Flag-Yar1                       | amp <sup>r</sup> , T7 promoter/ <i>lac</i> operator  | this study    |
| pETDuet-1-His6-Rps3(K7/K10>A)/Flag-Yar1             | amp <sup>r</sup> , T7 promoter/ <i>lac</i> operator  | this study    |
| pETDuet-1-Flag-Yar1                                 | amp <sup>r</sup> , T7 promoter/ <i>lac</i> operator  | <sup>12</sup> |
| pETDuet-1-His6-Yar1                                 | amp <sup>r</sup> , T7 promoter/ <i>lac</i> operator  | <sup>8</sup>  |
| pProEx-GST-TEV-Kap60ΔIBB (Kap60 amino acids 81-542) | amp <sup>r</sup> , TRC promoter/ <i>lac</i> operator | this study    |
| pGEX-4TEV-KAP123                                    | amp <sup>r</sup> , TAC promoter/ <i>lac</i> operator | <sup>13</sup> |
| pGEX-4TEV-PSE1                                      | amp <sup>r</sup> , TAC promoter/ <i>lac</i> operator | <sup>13</sup> |
| pGEX-4TEV-KAP104                                    | amp <sup>r</sup> , TAC promoter/ <i>lac</i> operator | <sup>14</sup> |
| pGEX-4T-SXM1                                        | amp <sup>r</sup> , TAC promoter/ <i>lac</i> operator | <sup>15</sup> |
| pGEX-4T-NMD5                                        | amp <sup>r</sup> , TAC promoter/ <i>lac</i> operator | <sup>15</sup> |
| pGEX-5G-KAP120                                      | amp <sup>r</sup> , TAC promoter/ <i>lac</i> operator | <sup>15</sup> |
| pGEX-4T-KAP114                                      | amp <sup>r</sup> , TAC promoter/ <i>lac</i> operator | <sup>15</sup> |
| pGEX-4T-PDR6                                        | amp <sup>r</sup> , TAC promoter/ <i>lac</i> operator | <sup>15</sup> |
| pGEX-4TEV-MTR10                                     | amp <sup>r</sup> , TAC promoter/ <i>lac</i> operator | <sup>15</sup> |
| pGEX-4T-MSN5                                        | amp <sup>r</sup> , TAC promoter/ <i>lac</i> operator | <sup>15</sup> |
| pGEX-Nup1 (amino acids 332-1076)                    | amp <sup>r</sup> , TAC promoter/ <i>lac</i> operator | <sup>16</sup> |
| pGEX-Nsp1-C (amino acids 591-823)                   | kan <sup>r</sup> , TAC promoter/ <i>lac</i> operator | <sup>17</sup> |
| pGEX-Nup42                                          | amp <sup>r</sup> , TAC promoter/ <i>lac</i> operator | <sup>16</sup> |
| pGEX-Nup116 (amino acids 165-715)                   | amp <sup>r</sup> , TAC promoter/ <i>lac</i> operator | <sup>16</sup> |
| pGEX-Nup159 (amino acids 457-900)                   | amp <sup>r</sup> , TAC promoter/ <i>lac</i> operator | <sup>18</sup> |
| pET32a-Arx1                                         | amp <sup>r</sup> , T7 promoter/ <i>lac</i> operator  | this study    |

## Supplementary References

1. Thomas, B. J. & Rothstein, R. Elevated recombination rates in transcriptionally active DNA. *Cell* **56**, 619–630 (1989).
2. Loeb, J. D. *et al.* The yeast nuclear import receptor is required for mitosis. *Proc. Natl. Acad. Sci. U. S. A.* **92**, 7647–7651 (1995).
3. Goffin, L. *et al.* The unfolded protein response transducer Ire1p contains a nuclear localization sequence recognized by multiple beta importins. *Mol. Biol. Cell* **17**, 5309–5323 (2006).
4. Seedorf, M. & Silver, P. A. Importin/karyopherin protein family members required for mRNA export from the nucleus. *Proc. Natl. Acad. Sci. U. S. A.* **94**, 8590–8595 (1997).
5. Senger, B. *et al.* Mtr10p functions as a nuclear import receptor for the mRNA-binding protein Npl3p. *EMBO J.* **17**, 2196–2207 (1998).
6. Pillet, B. *et al.* The Dedicated Chaperone Acl4 Escorts Ribosomal Protein Rpl4 to Its Nuclear Pre-60S Assembly Site. *PLoS Genet.* **11**, e1005565 (2015).
7. Neville, M. & Rosbash, M. The NES-Crm1p export pathway is not a major mRNA export route in *Saccharomyces cerevisiae*. *EMBO J.* **18**, 3746–3756 (1999).
8. Koch, B. *et al.* Yar1 protects the ribosomal protein Rps3 from aggregation. *J. Biol. Chem.* **287**, 21806–21815 (2012).
9. Yano, R., Oakes, M. L., Tabb, M. M. & Nomura, M. Yeast Srp1p has homology to armadillo/plakoglobin/beta-catenin and participates in apparently multiple nuclear functions including the maintenance of the nucleolar structure. *Proc. Natl. Acad. Sci. U. S. A.* **91**, 6880–6884 (1994).
10. Koepp, D. M., Wong, D. H., Corbett, A. H. & Silver, P. A. Dynamic localization of the nuclear import receptor and its interactions with transport factors. *J. Cell Biol.* **133**, 1163–1176 (1996).
11. Aitchison, J. D., Blobel, G. & Rout, M. P. Kap104p: a karyopherin involved in the nuclear transport of messenger RNA binding proteins. *Science* **274**, 624–627 (1996).

12. Mitterer, V. *et al.* Sequential domain assembly of ribosomal protein S3 drives 40S subunit maturation. *Nat. Commun.* **7**, 10336 (2016).
13. Fries, T. *et al.* A novel conserved nuclear localization signal is recognized by a group of yeast importins. *J. Biol. Chem.* **282**, 19292–19301 (2007).
14. Maurer, P. *et al.* The nuclear export receptor Xpo1p forms distinct complexes with NES transport substrates and the yeast Ran binding protein 1 (Yrb1p). *Mol. Biol. Cell* **12**, 539–549 (2001).
15. Caesar, S., Greiner, M. & Schlenstedt, G. Kap120 functions as a nuclear import receptor for ribosome assembly factor Rpf1 in yeast. *Mol. Cell. Biol.* **26**, 3170–3180 (2006).
16. Allen, N. P., Huang, L., Burlingame, A. & Rexach, M. Proteomic analysis of nucleoporin interacting proteins. *J. Biol. Chem.* **276**, 29268–29274 (2001).
17. Bailer, S. M., Balduf, C. & Hurt, E. The Nsp1p carboxy-terminal domain is organized into functionally distinct coiled-coil regions required for assembly of nucleoporin subcomplexes and nucleocytoplasmic transport. *Mol. Cell. Biol.* **21**, 7944–7955 (2001).
18. Strässer, K., Bassler, J. & Hurt, E. Binding of the Mex67p/Mtr2p heterodimer to FXFG, GLFG, and FG repeat nucleoporins is essential for nuclear mRNA export. *J. Cell Biol.* **150**, 695–706 (2000).
